# Supplementary material for: LAMP-2 deficiency leads to hippocampal dysfunction but normal clearance of neuronal substrates of chaperone-mediated autophagy in a mouse model for Danon disease
Source: PubMed Central journal article supplement (PMC4359523; doi:10.1186/s40478-014-0182-y), 2015-01-31

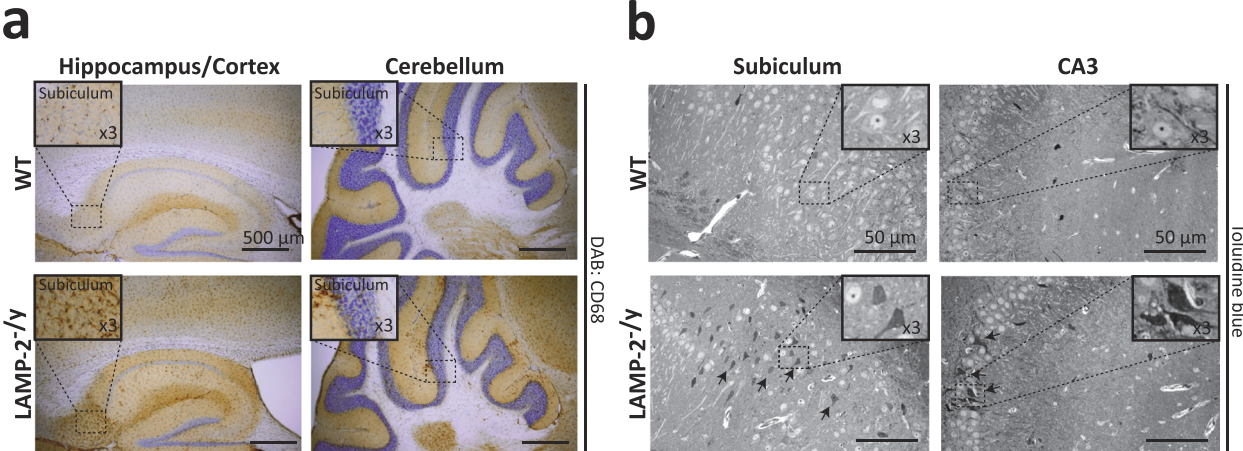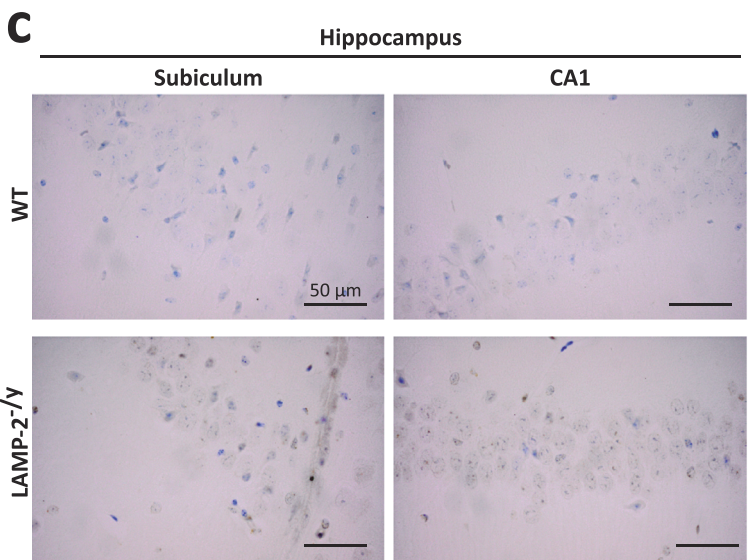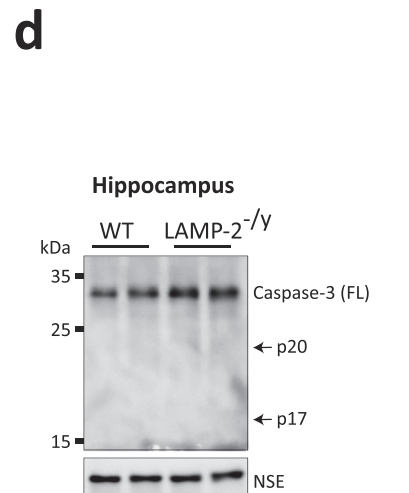

Supplement: 40478_2014_182_MOESM1_ESM.pdf [file 40478_2014_182_MOESM1_ESM.pdf]
