# Supplementary material for: LAMP-2 deficiency leads to hippocampal dysfunction but normal clearance of neuronal substrates of chaperone-mediated autophagy in a mouse model for Danon disease
Source: PubMed Central journal article supplement (PMC4359523; doi:10.1186/s40478-014-0182-y), 2015-01-31

**a****Hippocampus**

Subiculum

CA1

Pons

WT

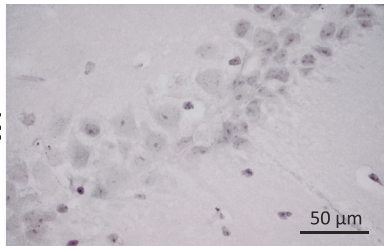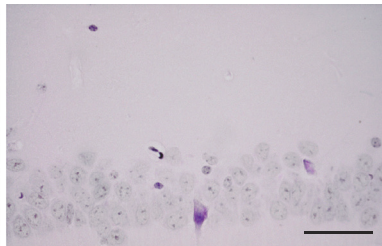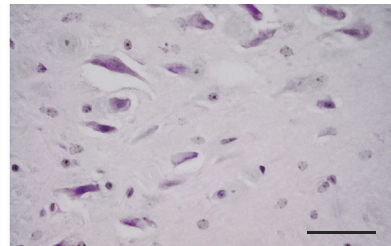LAMP-2<sup>-/-</sup>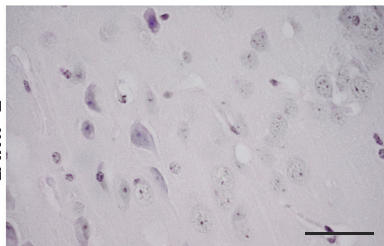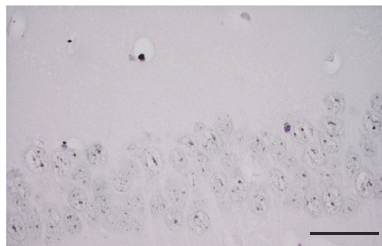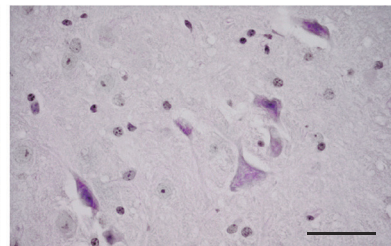

PAS staining

**b**

Healthy neurons in subiculum

WT

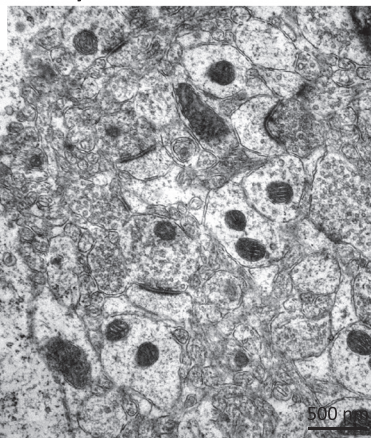

Electron microscopy

**c****Hippocampus**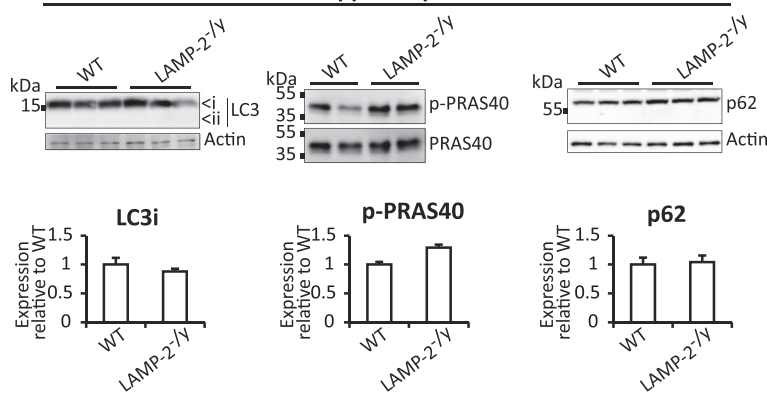

Supplement: 40478_2014_182_MOESM5_ESM.pdf [file 40478_2014_182_MOESM5_ESM.pdf]
